# Supplementary material for: Distinct antibody responses to SARS-CoV-2 in children and adults across the COVID-19 clinical spectrum
Source: Springer Nature journal article supplement (doi:10.1038/s41590-020-00826-9), 2020-11-05
Supplement: 41590_2020_826_MOESM5_ESM.xlsx [file 41590_2020_826_MOESM5_ESM.xlsx]

## Sheet: Fig-2a
	anti-S IgG
Time post symptom onset (days)	COVID-ARDS	CPD	MIS-C	Ped non-MIS-C
16	4.272
9	1.3015
15	3.735
16	3.4535
27	5.009
14	2.972
23	3.7135
19	2.2545
14	4.1355
17	3.6995
7	2.77708
21	3.4162
20	4.49873
24		3.1175
15		1.763
19		2.624
18		1.846
21		2.033
25		1.7025
23		1.8075
14		2.087
19		2.291
26		2.933
17		1.0745
37		2.12
19		1.6425
24		2.2025
24		1.9275
41		1.37698
43		1.63223
44		2.5135
48		3.55831
9			2.3985
6			1.866
6			1.521
5			1.655
5			2.637
19			3.824
7			2.217
7			2.32
7			1.9325
4			2.346
5			2.085
19			2.436
4			1.91566
3			1.9244
6			2.16972
1			2.99899
42				2.28246
9				0.51388
28				2.1642
45				2.15132
12				2.09335
35				2.17637
14				1.35049
35				1.11933
30				1.64964
49				1.84573
28				1.86291
28				3.06737
60				2.94284
60				2.34598
60				2.44044
20				2.07188

## Sheet: Fig-2b
	anti-S IgM
Duration illness (days)	COVID-ARDS	CPD	MIS-C	Ped non-MIS-C
16	4.7045
9	0.763
15	4.1815
16	2.7355
27	2.4555
14	0.8105
23	1.878
19	6.2025
14	4.6255
17	5.996
7	1.36273
21	3.14839
20	5.19692
24		2.086
15		0.7265
19		1.292
18		4.1655
21		1.31
25		0.759
23		0.4865
14		0.656
19		1.4845
26		2.105
17		0.4
37		0.713
19		0.9215
24		2.492
24		0.741
41		0.77417
43		0.865205
44		1.47081
48		4.29241
9			0.489
6			0.412
6			0.441
5			0.409
5			0.7555
19			3.3285
7			1.965
7			0.7885
7			0.565
4			0.4185
5			0.5535
19			1.034
4			0.792182
3			0.485486
6			0.472342
1			3.36745
42				1.15437
9				1.10241
28				0.608178
45				0.642314
12				0.821406
35				0.937667
14				0.541884
35				0.628462
30				0.459265
49				0.246532
28				0.416223
28				0.344488
60				0.528032
60				1.47791
60				1.05937
20				1.16277
