# Supplementary material for: Distinct antibody responses to SARS-CoV-2 in children and adults across the COVID-19 clinical spectrum
Source: Springer Nature journal article supplement (doi:10.1038/s41590-020-00826-9), 2020-11-05
Supplement: 41590_2020_826_MOESM8_ESM.xlsx [file 41590_2020_826_MOESM8_ESM.xlsx]

## Sheet: Ex-fig-1
	SARS-CoV-1	MERS	SARS-CoV-2	SARS-CoV-2 D614G
MIS-C	10.5253	9.84152	53.8371	62.3274
MIS-C	3.01645	4.59716	34.5887	37.6923
MIS-C	1.98814	9.7855	25.6176	24.0698
MIS-C	1.0849	12.8059	23.2752	32.8632
MIS-C	3.64763	7.59655	38.9407	46.4643
MIS-C	21.2153	14.9019	55.3495	73.9364
MIS-C	1.96353	8.1962	39.3727	41.5609
MIS-C	2.65093	11.4896	42.9158	45.4258
MIS-C	2.33033	10.4464	30.7101	32.8456
MIS-C	4.14464	10.4384	41.2756	47.5773
MIS-C	3.81957	6.21596	35.8269	48.503
MIS-C	8.05854	16.8423	42.0067	49.8943
COVID-ARDS	22.015	16.5649	71.1766	84.5221
COVID-ARDS	5.099	12.9886	23.4433	33.3506
COVID-ARDS	11.6568	8.44493	49.8956	70.8274
COVID-ARDS	9.63687	17.9615	50.0177	65.6193
COVID-ARDS	23.5357	26.7703	53.4456	76.0468
COVID-ARDS	4.94687	17.7219	41.9153	51.5285
COVID-ARDS	21.4516	28.6839	72.8648	80.9267
COVID-ARDS	5.68555	9.13071	33.4225	50.0618
COVID-ARDS	18.1497	20.9908	44.2963	65.3239
COVID-ARDS	7.88044	16.8829	47.5874	57.2853
COVID-ARDS	6.76283	16.0988	41.2918	47.5801
CPD	11.1869	16.2653	51.2888	48.7552
CPD	7.20954	11.4215	35.8183	28.1552
CPD	9.53237	20.7844	46.996	46.6756
CPD	8.23999	10.9661	39.5764	34.3549
CPD	11.8772	12.8919		67.573
CPD	13.6429	16.1545	37.9394	50.2099
CPD	9.74077	17.1962	34.2802	33.5657
CPD	14.7887	19.4873	38.9589	48.5954
CPD	15.7895	23.671	51.6569	70.4861
CPD	13.3858	16.5977	58.6043	66.8428
CPD	10.9547	21.3101	27.9161	17.8362
CPD	15.0067	24.6139	55.3376	46.641
CPD	11.2863	18.6194	35.8867	32.4225
CPD	17.1942	19.6957	54.756	56.4113
CPD	12.0009	14.2513	47.6413	49.3899
Ped non-MIS-C	6.449	4.47263	9.12943	3.73437
Ped non-MIS-C	7.71249	5.98336	7.66947	6.12127
Ped non-MIS-C	1.41654	3.09505	10.441	14.2425
Ped non-MIS-C	9.02145	5.15073	53.1908	61.6183
Ped non-MIS-C	7.33751	4.29152	53.3238	61.7507
Ped non-MIS-C	8.0017	18.9242	53.2174	59.3081
Ped non-MIS-C	8.28854	1.56218	53.2924	61.8339
Ped non-MIS-C	4.46532	13.8968	52.6072	36.1401
Ped non-MIS-C	1.55033	2.39399	52.6345	56.9993
Ped non-MIS-C	0.668395	2.29948	52.3021	59.7555
Ped non-MIS-C	1.65827	1.37914	52.6878	54.3209
Ped non-MIS-C	2.019	9.33274	46.6498	22.7442
Ped non-MIS-C	5.63861	11.1117	52.8028	55.8419
Ped non-MIS-C	1.57672	2.72798	7.74914	12.876
Ped non-MIS-C	9.665	14.4485	53.1495	60.0337
Ped non-MIS-C	4.9982	6.03081	37.3205	44.9541
Ped non-MIS-C	9.2679	14.2755	48.3294	52.1237
Ped non-MIS-C	11.0757	16.128	53.4393	60.5275
Ped non-MIS-C	6.63074	6.78123	40.926	27.085
Ped non-MIS-C	0.073168	0.444443	10.1627	0.933912
Ped non-MIS-C	13.9666	16.1062	55.8938	60.0663
Ped non-MIS-C	11.1935	23.4694	49.942	51.3965
Ped non-MIS-C	6.33958	4.50575	43.4442	36.29
Ped non-MIS-C	1.33289	2.51076	46.3314	33.4987
Ped non-MIS-C	3.65982	1.13731	52.6171	58.1751
Ped non-MIS-C	2.08706	7.05279	42.5094	26.3815
Ped non-MIS-C	4.66621	10.8438	51.5646	56.6294
Ped non-MIS-C	13.3529	27.0342	47.8865	59.3562
Neg	6.53795	9.48219	7.74061	9.57617
Neg	11.9513	18.8833	8.8631	17.3412
Neg	5.58514	10.7774	13.4888	7.72664
Neg	6.47744	7.07382	8.10504	5.77583
Neg	5.24243	18.2305	13.5688	10.1494
Neg	8.97059	12.0494	10.9083	9.75578
